# Supplementary material for: Industrial production efficiency and its determinants: Evidence from the eastern, western, and northern regions of Guangdong
Source: Research Square preprint supplement (doi:10.21203/rs.3.rs-7913129/v1), 2025-11-10
Supplement: Supplementary file 1 [file 3c56ae9bf846dd6c44062362.docx]

Table A. Abbreviations of prefecture-level cities in EWN Guangdong.

| **City Name** | **Abbreviation** |
| --- | --- |
| Yangjiang | YJ |
| Zhanjiang | ZJ |
| Maoming | MM |
| Shantou | ST |
| Shanwei | SW |
| Chaozhou | CZ |
| Jieyang | JY |
| Yunfu | YF |
| Qingyuan | QY |
| Meizhou | MZ |
| Heyuan | HY |
| Shaoguan | SG |
